# Supplementary material for: Cold tolerance and diapause within and across trophic levels: endoparasitic wasps and their fly host have similar phenotypes
Source: bioRxiv or medRxiv preprint supplement (doi:10.1101/2023.01.04.522725), 2023-01-04
Supplement: Supplementary file [file media-1.pdf]

**Supplementary Figures and Tables for**  
**“Cold tolerance and diapause within across trophic levels: endoparasitic wasps and their**  
**fly host have similar phenotypes”**

Trinity McIntyre, Lalitya Andaloori, Glen Ray Hood, Jeffrey L. Feder, Daniel A. Hahn,  
Gregory J. Ragland, Jantina Toxopeus

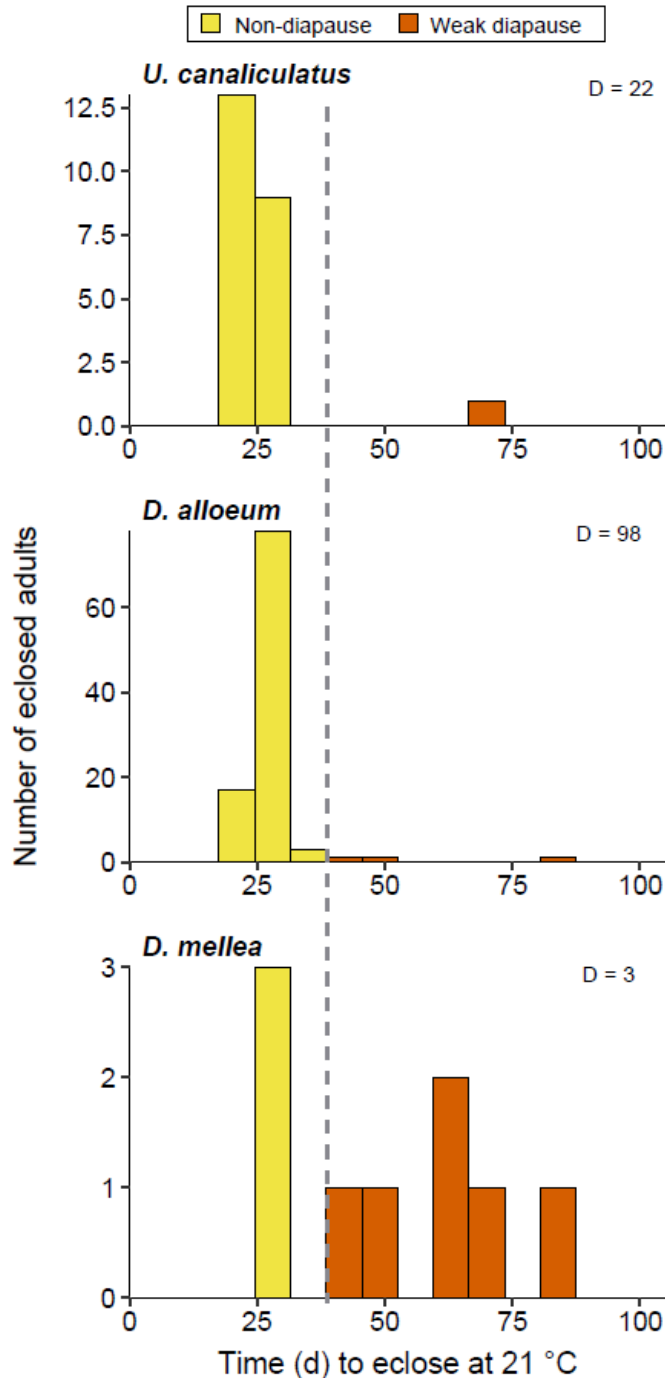

**Figure S1.** Distribution of time to eclosion at 21°C for (A) *Utetes canaliculatus*, (B) *Diachasma alloenum*, and (C) *Diachasmimorpha mellea* in the absence of chilling. Each bar represents the total number of individuals for a particular species that eclosed in a 7-day period. Individuals to the left of the dashed line (early eclosing phenotype) were classified as non-diapause (ND); individuals to the right of the dashed line (late eclosing phenotype) were classified as weak diapause (WD). The number of wasps that remained unclosed after 100 days (prolonged diapause, D) is indicated in the top right of each panel.

**Table S1.** Comparison of the proportion  $\pm$  95% confidence interval and number (N) of pupae in each diapause class when diapause phenotype is determined via respirometry or eclosion time at 21°C. The 95% confidence intervals overlap for proportions calculated from either experiment (respirometry or eclosion time), therefore we pooled the data shown here for display in Fig. 1.

| Species                       | Phenotyping experiment | Proportion in each diapause class (N) |                        |                         |
|-------------------------------|------------------------|---------------------------------------|------------------------|-------------------------|
|                               |                        | Non-diapause                          | Weak diapause          | Diapause                |
| <i>Diachasma alloeum</i>      | Respirometry           | 0.58 $\pm$ 0.16<br>(35)               | 0.03 $\pm$ 0.25<br>(2) | 0.38 $\pm$ 0.20<br>(23) |
|                               | Eclosion time          | 0.79 $\pm$ 0.08<br>(98)               | 0.02 $\pm$ 0.17<br>(3) | 0.19 $\pm$ 0.16<br>(23) |
| <i>Diachasmimorpha mellea</i> | Respirometry           | 0<br>(0)                              | 0.03 $\pm$ 0.25<br>(2) | 0.97 $\pm$ 0.05<br>(59) |
|                               | Eclosion time          | 0.03 $\pm$ 0.19<br>(3)                | 0.06 $\pm$ 0.19<br>(6) | 0.91 $\pm$ 0.06<br>(91) |
| <i>Utetes canaliculatus</i>   | Respirometry           | 0.86 $\pm$ 0.28<br>(6)                | 0<br>(0)               | 0.14 $\pm$ 0.69<br>(1)  |
|                               | Eclosion time          | 0.96 $\pm$ 0.09<br>(22)               | 0.04 $\pm$ 0.4<br>(1)  | 0<br>(0)                |

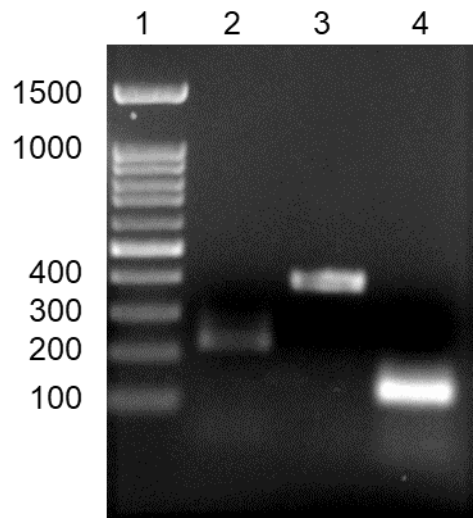

**Figure S2.** Representative agarose gel of PCR products of a portion of the *cytochrome oxidase I (COI)* mitochondrial gene with the species-specific primers in Table 1. Each primer pair was used to amplify a product from DNA of one adult of the appropriate species (identified by morphology) using the PCR conditions described in the main text. Lanes: 1, ladder, with relevant sizes indicated to the left in bp (base pairs); 2, *Utetes canaliculatus*; 3, *Diachasma alloeum*; 4, *Diachasmimorpha mellea*.

|            |                                                                       |     |
|------------|-----------------------------------------------------------------------|-----|
| EU881544.1 | -----TGAGCTGGGGTG                                                     | 12  |
| D.alloenum | -----                                                                 | 0   |
| KR890748.1 | -----GTTTTGTATTTTTGTATGGGATTTGAGCTGGGGTG                              | 36  |
| KU511212.1 | TCAACAAATCATAAAGATATTGGTGTTTGTATTTTTGTATGGGATTTGAGCTGGGGTG            | 60  |
|            |                                                                       |     |
| EU881544.1 | TTAGGTTTATCTATAAGAATAATTATTCGATTAGAATTAGGGATACCTGGGAGATTGTTA          | 72  |
| D.alloenum | -----                                                                 | 0   |
| KR890748.1 | TTAGGTTTATCTATAAGAATAATTATTCGATTAGAATTAGGGATACCTGGGAGATTGTTA          | 96  |
| KU511212.1 | TTAGGTTTATCTATAAGAATAATTATTCGATTAGAATTAGGGATACCTGGGAGATTGTTA          | 120 |
|            |                                                                       |     |
| EU881544.1 | AATGATCAGATTTATAATAGAATAGTAACTGCTCATGCTTTTGTATAATTTTTTTTACA           | 132 |
| D.alloenum | -----TTTGTATAAATTTTTTTTACA                                            | 21  |
| KR890748.1 | AATGATCAGATTTATAATAGAATAGTAACTGCTCATGCTTTTGTATAATTTTTTTTACA           | 156 |
| KU511212.1 | AATGATCAGATTTATAATAGAATAGTAACTGCTCATGCTTTTGTATAATTTTTTTTACA<br>*****  | 180 |
|            |                                                                       |     |
| EU881544.1 | GTTATACCTATTATAAATGGGGGGTTGGGAATTGATTAATTCCTTTAATATTAGGGGTT           | 192 |
| D.alloenum | GTTATACCTATTATAAATGGAGGGTTGGGAATTGATTAATTCCTTTAATATTAGGGGTT           | 81  |
| KR890748.1 | GTTATACCTATTATAAATGGAGGGTTGGGAATTGATTAATTCCTTTAATATTAGGGGTT           | 216 |
| KU511212.1 | GTTATACCTATTATAAATGGAGGGTTGGGAATTGATTAATTCCTTTAATATTAGGGGTT<br>*****  | 240 |
|            |                                                                       |     |
| EU881544.1 | CCTGATATAGCCTTTCCTCGAATAAATAATATAAGATTTTGATTATTGAGACCTTCTATA          | 252 |
| D.alloenum | CCTGATATAGCCTTTCCTCGAATAAATAATATAAGATTTTGATTATTGAGACCTTCTATA          | 141 |
| KR890748.1 | CCTGATATAGCCTTTCCTCGAATAAATAATATAAGATTTTGATTATTGAGACCTTCTATA          | 276 |
| KU511212.1 | CCTGATATAGCCTTTCCTCGAATAAATAATATAAGATTTTGATTATTGAGACCTTCTATA<br>***** | 300 |
|            |                                                                       |     |
| EU881544.1 | ATTTTGTTAATATTGAGAATATTATTAATTTAGGTGCTGGAACCTGGTTGGACAATTTAT          | 312 |
| D.alloenum | ATTTTGTTAATATTGAGAATATTATTAATTTAGGTGCTGGAACCTGGTTGGACAATTTAT          | 201 |
| KR890748.1 | ATTTTGTTAATATTGAGAATATTATTAATTTAGGTGCTGGAACCTGGTTGGACAATTTAT          | 336 |
| KU511212.1 | ATTTTGTTAATATTGAGAATATTATTAATTTAGGTGCTGGAACCTGGTTGGACAATTTAT<br>***** | 360 |
|            |                                                                       |     |
| EU881544.1 | CCTCCTTTATCATCTAGATTAGGTCATAGGGGGTTAGCAGTAGATTTATTAATTTTTAGT          | 372 |
| D.alloenum | CCTCCTTTATCATCTAGATTAGGTCATAGGGGGTTAGCAGTAGATTTATTAATTTTTAGT          | 261 |
| KR890748.1 | CCTCCTTTATCATCTAGATTAGGTCATAGGGGGTTAGCAGTAGATTTATTAATTTTTAGT          | 396 |
| KU511212.1 | CCTCCTTTATCATCTAGATTAGGTCATAGGGGGTTAGCAGTAGATTTATTAATTTTTAGT<br>***** | 420 |
|            |                                                                       |     |
| EU881544.1 | TTACATTTAGCTGGGGTATCATCAATTATGGGGGCAATTAATTTTATTTGTACAATTTTA          | 432 |
| D.alloenum | TTACATTTAGCTGGGGTATCATCAATTATGGGGGCAATTAATTTTATTTGTACAATTTTA          | 321 |
| KR890748.1 | TTACATTTAGCTGGGGTATCATCAATTATGGGGGCAATTAATTTTATTTGTACAATTTTA          | 456 |
| KU511212.1 | TTACATTTAGCTGGGGTATCATCAATTATGGGGGCAATTAATTTTATTTGTACAATTTTA<br>***** | 480 |
|            |                                                                       |     |
| EU881544.1 | AATATAAAGCTTTTCATAAAGTTTGAGCAATTAAGTTTATTTATTTGGTCAATTTTAATT          | 492 |
| D.alloenum | AATATAAAGCTTTTCATAAAGTTTGAGCAATTAAGTTTATTTATTTGGTCAATTTTAATT          | 355 |
| KR890748.1 | AATATAAAGCTTTTCATAAAGTTTGAGCAATTAAGTTTATTTATTTGGTCAATTTTAATT          | 516 |
| KU511212.1 | AATATAAAGCTTTTCATAAAGTTTGAGCAATTAAGTTTATTTATTTGGTCAATTTTAATT<br>***** | 540 |
|            |                                                                       |     |
| EU881544.1 | ACAGCTATTTTATTATTATTATCTTTACCGGTTTTAGCTGGAGCTATTACAATATTATTA          | 552 |
| D.alloenum | -----                                                                 | 355 |
| KR890748.1 | ACAGCTATTTTATTATTATTATCTTTACCGGTTTTAGCTGGAGCTATTACAATA-----           | 570 |
| KU511212.1 | ACAGCTATTTTATTATTATTATCTTTACCGGTTTTAGCTGGAGCTATTACAATATTATTA          | 600 |

**Figure S3.** Alignment of the positive control *Diachasma alloenum* PCR amplicon to *cytochrome oxidase I (COI)* gene sequences from *D. alloenum* vouchers in NCBI. Default parameters were used in Clustal Omega (<https://www.ebi.ac.uk/Tools/msa/clustalo/>) for alignment Asterisks (\*) indicate exact matches between our sequence (*D. alloenum*) and the three NCBI sequences (identified by NCBI accession numbers).

```

KT761492.1   TCAATAAGAATAAATTATTCGGATAGAATTAGGGGTCCTGGTAGGATATTGATAAGAGAT 60
KT761495.1   TCAATAAGAATAAATTATTCGGATAGAATTAGGGGTCCTGGTAGGATATTGATAAGAGAT 60
D.mellea     ----- 0
KT761488.1   TCAATAAGAATAAATTATTCGGATAGAATTAGGGGTCCTGGTAGGATATTGATAAGAGAT 60

KT761492.1   CAACTTTATAAATAGTATAGTTACTTCTCATGCTTTTGTATAAATTTTTTTTATAGTTATA 120
KT761495.1   CAACTTTATAAATAGTATAGTTACTTCTCATGCTTTTGTATAAATTTTTTTTATAGTTATA 120
D.mellea     -----TTACTTCTCATGCTTTTGTATAAATTTTTTTTATAGTTATA 41
KT761488.1   CAACTTTATAAATAGTATAGTTACTTCTCATGCTTTTGTATAAATTTTTTTTATAGTTATA 120
                *****

KT761492.1   CCTATTATAAATGGTGGGTTTGGTAATGGTGGTACCTTTAATATTAGGGGCTCCTGAT 180
KT761495.1   CCTATTATAAATGGTGGGTTTGGTAATGGTGGTACCTTTAATATTAGGGGCTCCTGAT 180
D.mellea     CCTATTATAAATGGTGGGTTTGGTAATGGTGGTACCTTTAATATTA----- 89
KT761488.1   CCTATTATAAATGGTGGGTTTGGTAATGGTGGTACCTTTAATATTAGGGGCTCCTGAT 180
                *****

KT761492.1   ATAGCTTCCCTCGAATAAATAATATAAGGTTTGGATTACTTGTTCCTTCTTTATTTTAA 240
KT761495.1   ATAGCTTCCCTCGAATAAATAATATAAGGTTTGGATTACTTGTTCCTTCTTTATTTTAA 240
D.mellea     ----- 89
KT761488.1   ATAGCTTCCCTCGAATAAATAATATAAGGTTTGGATTACTTGTTCCTTCTTTATTTTAA 240

KT761492.1   TTAATGTTGAGAAGATTATTAATTTGGGGGTTGGAAGTGGTGAACAGTTTATCCTCCA 300
KT761495.1   TTAATGTTGAGAAGATTATTAATTTGGGGGTTGGAAGTGGTGAACAGTTTATCCTCCA 300
D.mellea     ----- 89
KT761488.1   TTAATGTTGAGAAGATTATTAATTTGGGGGTTGGAAGTGGTGAACAGTTTATCCTCCA 300

KT761492.1   TTGTCATCAAATTTGGGGCATGTAGGTTTCATCCGTTGATTTAGCTATTTTTCTTTACAT 360
KT761495.1   TTGTCATCAAATTTGGGGCATGTAGGTTTCATCCGTTGATTTAGCTATTTTTCTTTACAT 360
D.mellea     ----- 89
KT761488.1   TTGTCATCAAATTTGGGGCATGTAGGTTTCATCCGTTGATTTAGCTATTTTTCTTTACAT 360

KT761492.1   TTGGCGGGAGTTTCTTCAATTATAGGGGCTATTAATTTTATTAGAACAATTTTGAATATA 420
KT761495.1   TTGGCGGGAGTTTCTTCAATTATAGGGGCTATTAATTTTATTAGAACAATTTTGAATATA 420
D.mellea     ----- 89
KT761488.1   TTGGCGGGAGTTTCTTCAATTATAGGGGCTATTAATTTTATTAGAACAATTTTGAATATA 420

KT761492.1   AATTTTTATATAAATTAATTAGATCAGTTAAGTTTATTAATTTGGTCAATTTAATTACG 480
KT761495.1   AATTTTTATATAAATTAATTAGATCAGTTAAGTTTATTAATTTGGTCAATTTAATTACG 480
D.mellea     ----- 89
KT761488.1   AATTTTTATATAAATTAATTAGATCAGTTAAGTTTATTAATTTGGTCAATTTAATTACG 480

KT761492.1   GCTATTTTATTGTTGTTATCTTTGCCTGTTTTAGCTGGTGCATTACTATGTTGTTAACT 540
KT761495.1   GCTATTTTATTGTTGTTATCTTTGCCTGTTTTAGCTGGTGCATTACTATGTTGTTAACT 540
D.mellea     ----- 89
KT761488.1   GCTATTTTATTGTTGTTATCTTTGCCTGTTTTAGCTGGTGCATTACTATGTTGTTAACT 540

KT761492.1   GATCGAAATTTAAATACG      558
KT761495.1   GATCGAAATTTAAATACG      558
D.mellea     ----- 89
KT761488.1   GATCGAAATTTAAATACG      558

```

**Figure S4.** Alignment of the positive control *Diachasmimorpha mellea* PCR amplicon to *cytochrome oxidase I (COI)* gene sequences from *D. mellea* vouchers in NCBI. Default parameters were used in Clustal Omega (<https://www.ebi.ac.uk/Tools/msa/clustalo/>) for alignment Asterisks (\*) indicate exact matches between our sequence (*D. mellea*) and the three NCBI sequences (identified by NCBI accession numbers).

|                  |                                                                |     |
|------------------|----------------------------------------------------------------|-----|
| KU511220.1       | TCTGGTATAGTAGGTTTATCAATAAGATTAATTATTTCGTATAGAATTAGGTGTTCCCTGGA | 60  |
| KT761328.1       | -----CCTGGA                                                    | 6   |
| U. canaliculatus | -----                                                          | 0   |
| KT761344.1       | -----CCTGGA                                                    | 6   |
| KU511220.1       | AGATTATTAATAAATGATCAAATTTATAATAGAATAGTTACGGCACATGCTTTTGTAAATA  | 120 |
| KT761328.1       | AGATTATTAATAAATGATCAAATTTATAATAGAATAGTTACGGCACATGCTTTTGTAAATA  | 66  |
| U. canaliculatus | -----                                                          | 0   |
| KT761344.1       | AGATTATTAATAAATGATCAAATTTATAATAGAATAGTTACGGCACATGCTTTTGTAAATA  | 66  |
| KU511220.1       | ATTTTTTTTATAGTTATGCCAATTATAAATGGTGGTTTTGGTAATTGATTAATTCCTTTA   | 180 |
| KT761328.1       | ATTTTTTTTATAGTTATGCCAATTATAAATGGTGGTTTTGGTAATTGATTAATTCCTTTA   | 126 |
| U. canaliculatus | -----                                                          | 0   |
| KT761344.1       | ATTTTTTTTATAGTTATGCCAATTATAAATGGTGGTTTTGGTAATTGATTAATTCCTTTA   | 126 |
| KU511220.1       | ATATTAGGAGCTCCTGATATAGCTTTCCCTCGTATAAATAATATAAGTTTTTGATTATTA   | 240 |
| KT761328.1       | ATATTAGGAGCTCCTGATATAGCTTTCCCTCGTATAAATAATATAAGTTTTTGATTATTA   | 186 |
| U. canaliculatus | -----                                                          | 0   |
| KT761344.1       | ATATTAGGAGCTCCTGATATAGCTTTCCCTCGTATAAATAATATAAGTTTTTGATTATTA   | 186 |
| KU511220.1       | ATTCCTTCATTAATATTATTAATTTTGAGAAGATTATTAATGTTGGTGTGGTACTGGT     | 300 |
| KT761328.1       | ATTCCTTCATTAATATTATTAATTTTGAGAAGATTATTAATGTTGGTGTGGTACTGGT     | 246 |
| U. canaliculatus | -----Tgttggtggtggtactggt                                       | 19  |
| KT761344.1       | ATTCCTTCATTAATATTATTAATTTTGAGAAGATTATTAATGTTGGTGTGGTACTGGT     | 246 |
|                  | *****                                                          |     |
| KU511220.1       | TGAACAGTTTATCCACCTTTATCTTCAACATTAGGTCATGGTGGATTATCTGTTGATTTA   | 360 |
| KT761328.1       | TGAACAGTTTATCCACCTTTATCTTCAACATTAGGTCATGGTGGGTATCTGTTGATTTA    | 306 |
| U. canaliculatus | tgaacagtttatccacctttatcttcaacattaggtcatgggtgggttatctggtgattta  | 79  |
| KT761344.1       | TGAACAGTTTATCCACCTTTATCTTCAACATTAGGTCATGGTGGGTATCTGTTGATTTA    | 306 |
|                  | *****                                                          |     |
| KU511220.1       | GCTATTTTTTCTTTACATTTAGCAGGTGTTTCTTCAATTATAGGGGCTATTAATTTTATT   | 420 |
| KT761328.1       | GCTATTTTTTCTTTACATTTAGCAGGTGTTTCTTCAATTATAGGGGCTATTAATTTTATT   | 366 |
| U. canaliculatus | gctatTTTTTCTTTACATTTAGCAGGTGTTTCTTCAATTATAGGGGCTATTAATTTTATT   | 139 |
| KT761344.1       | GCTATTTTTTCTTTACATTTAGCAGGTGTTTCTTCAATTATAGGGGCTATTAATTTTATT   | 366 |
|                  | *****                                                          |     |
| KU511220.1       | ACTACTATTTTTAATATAAAATTTTTTTATAATTAAGTTAGATCAATTAAGATTATTAATT  | 480 |
| KT761328.1       | ACTACTATTTTTAATATAAAATTTTTTTATAATTAAGTTAGATCAATTAAGATTATTAATT  | 426 |
| U. canaliculatus | actactatTTTTAATATAAAATTTTTTTATAATTAAGTTAGATCAATTAAGATTATTAATT  | 186 |
| KT761344.1       | ACTACTATTTTTAATATAAAATTTTTTTATAATTAAGTTAGATCAATTAAGATTATTAATT  | 426 |
|                  | *****                                                          |     |
| KU511220.1       | TGATCAATTTTAATTACAGCTATTTTATTATTATTATCTTTACCAGTATTAGCTGGAGCT   | 540 |
| KT761328.1       | TGATCAATTTTAATTACAGCTATTTTATTATTATTATCTTTACCAGTATTAGCTGGAGCT   | 486 |
| U. canaliculatus | -----                                                          | 186 |
| KT761344.1       | TGATCAATTTTAATTACAGCTATTTTATTATTATTATCTTTACCAGTATTAGCTGGAGCT   | 486 |
| KU511220.1       | ATTACGATATTATTAAGTATCGAAATTTAAATACATCATTTTTTGATTTTTCTGGTGGG    | 600 |
| KT761328.1       | ATTACGATATTATTAAGTATCGAAATTTAAATACATCATTTTTTGATTTTTCTGGT---    | 543 |
| U. canaliculatus | -----                                                          | 186 |
| KT761344.1       | ATTACTATATTATTAAGTATCGAAATTTAAATACATCATTTTTTGATTTTTCTGGT---    | 543 |

**Figure S5.** Alignment of the positive control *Utetes canaliculatus* PCR amplicon to *cytochrome oxidase I (COI)* gene sequences from *U. canaliculatus* vouchers in NCBI. Default parameters were used in Clustal Omega (<https://www.ebi.ac.uk/Tools/msa/clustalo/>) for alignment Asterisks (\*) indicate exact matches between our sequence (*U. canaliculatus*) and the three NCBI sequences (identified by NCBI accession numbers).

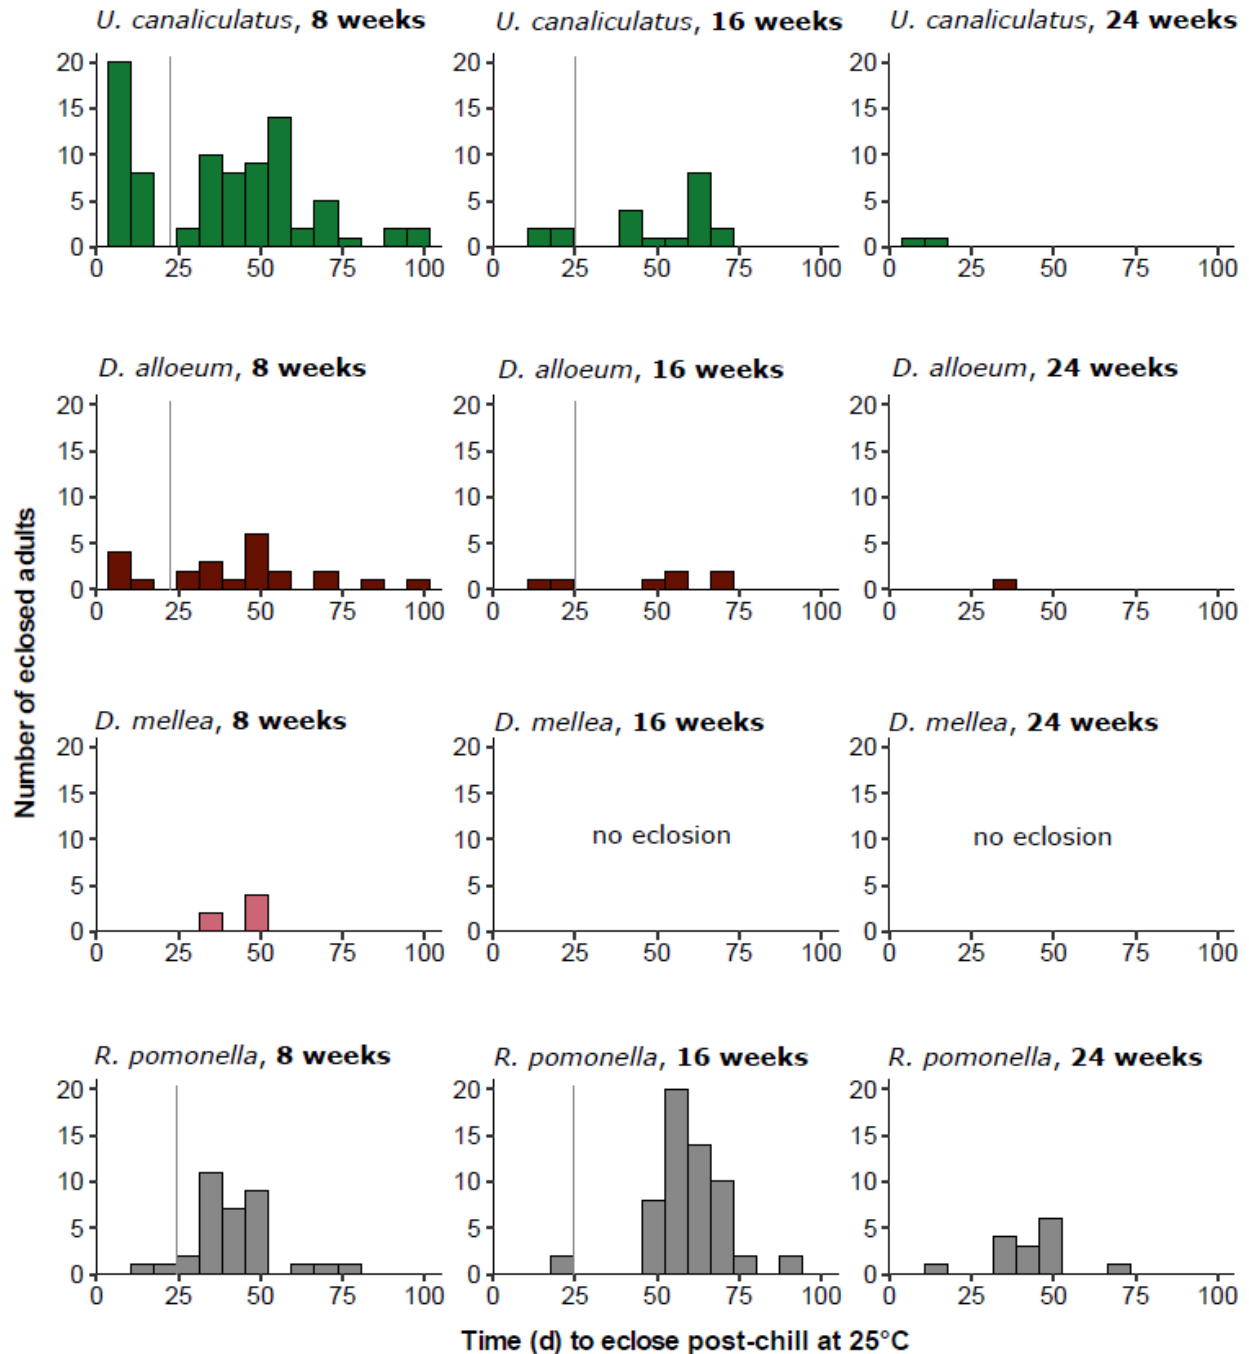

**Figure S6.** Distribution of eclosion phenology for *Rhagoletis pomonella* and the parasitoids that attack the fly (*Diachasma alloenum*, *Diachasmimorpha mellea*, *Utetes canaliculatus*) at 25°C after 8, 16, or 24 weeks of chilling at 4°C. For each chill treatment (column), 325 pupae (parasitized and unparasitized) were chilled. Each bar represents the total number of individuals for a particular species that eclosed in a 7-day period (1 week). Individuals with eclosion times less than (to the left of) the vertical grey line likely never entered diapause (non-diapause).

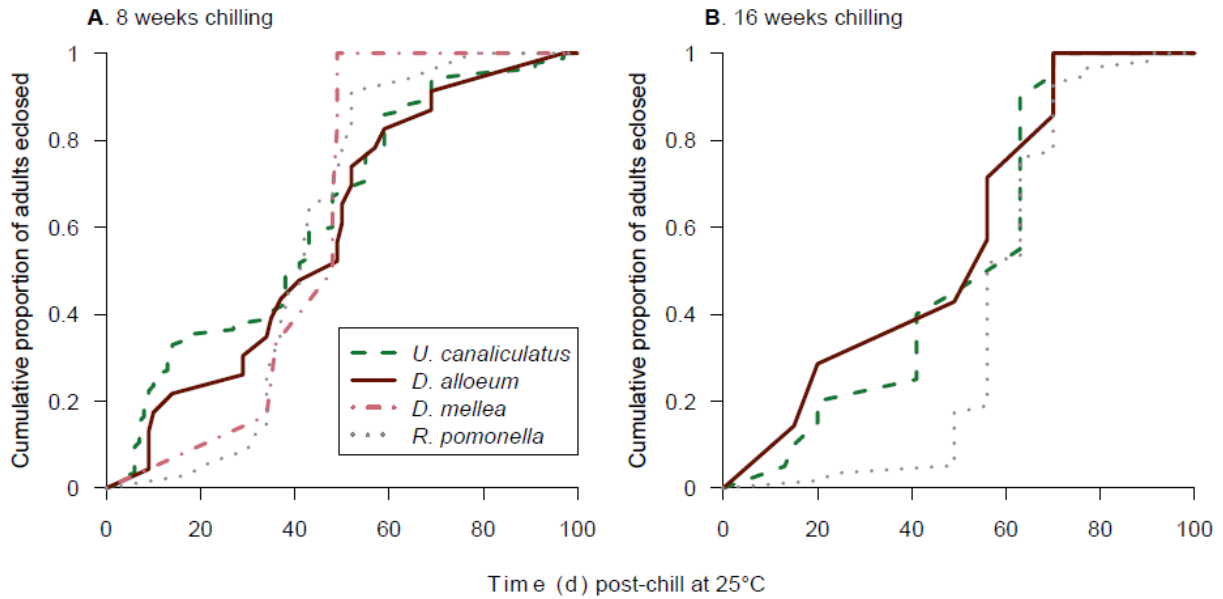

**Figure S7.** Cumulative number of adult flies and parasitoid species that eclosed within 100 days at 25°C after chilling at 4°C for (A) 8 weeks or (B) 16 weeks. These data are the same as in Fig. S6, but expressed as proportions rather than total numbers of eclosed individuals. Pairwise differences in eclosion times were assessed via Kolmogorov-Smirnov (K-S) tests. The K-S tests revealed that *U. canaliculatus* and *R. pomonella* had different eclosion distributions from each other after 8 weeks ( $D = 0.329$ ,  $P = 0.011$ ) and 16 weeks chilling ( $D = 0.366$ ,  $P = 0.038$ ). No other pairwise comparisons were significant ( $P > 0.05$ ). Insufficient wasps eclosed after 24 weeks chilling ( $< 2$  per wasp species) to plot proportion eclosion. However, all data including the 24 week treatment are displayed in Fig. S6.
